# Supplementary material for: Glycine-Rich RNA-Binding Protein AtGRP7 Functions in Nickel and Lead Tolerance in Arabidopsis
Source: MDPI journal article supplement (doi:10.3390/plants13020187), 2024-01-10
Supplement: s1 [file s1]

**Supplementary Table S1** Primers for qRT-PCR used in this study.

|                          | Gene   | Forward primer (5' to 3') | Reverse primer (5' to 3') |
|--------------------------|--------|---------------------------|---------------------------|
| Heavy metal<br>Chelation | MT1a   | CCTGCAAATGTGGTGACTCT      | ACCCACAGCTGCAGTTTGAT      |
|                          | MT1c   | CCTGCAAATGTGGTGATTCGT     | ACAGTTACAGCTTGACCCGCA     |
|                          | MT2a   | GCGAGACAACCACAAGTGA       | TGCAGGTGCAAGGATCACAC      |
|                          | MT2b   | GTGGAAGCTGTGGTTGTGG       | AACGAAAGTCTCGCCGGAAG      |
|                          | MT3    | TGCTGACAAGACCCAGTGC       | GCAAGTGCAGTTGACGCAG       |
|                          | MT4a   | ATCTGAATGTGGCAGAGGGAC     | CATGTGCCCTTGATCCCCAG      |
|                          | MT4b   | TGCAGGTAAATGATGAGCG       | CAAGTGCAACCCTTAGCAG       |
|                          | GS1    | AGCATGTCGCTGAAGATGTC      | AACACGGGATCTACGCTTTG      |
|                          | GS2    | GTTTCGTTTCCTGGCCTTAGTC    | CCATGACTACCGCTCTTGGG      |
|                          | PCS1   | TGGTGACTGGAGTTGTGGTG      | CCCTGACCATGTCTGTGGAG      |
|                          | PCS2   | TTGACCCGGGAAGAAAGTGG      | TTTGTGCGGAAAGCTTCGAC      |
| ROS<br>Scavenging        | CuSOD1 | GGTCCACATTTCAACCCCGA      | CTGCATGGACAACAACAGCC      |
|                          | CuSOD2 | GATGGCGTGGCAGAAACAAC      | CCACCCTTTCCGAGGTCATC      |
|                          | FeSOD1 | TCACCGCAAACCTACGTCCTC     | GAGCAGCGTTGTTGAAAGCA      |
|                          | FeSOD2 | ACGGTTAGGGACAAAGGTGG      | AATCCAAGGTTTCCCGGCTC      |
|                          | FeSOD3 | GGATGTGTGGGAGCACTCTT      | AGCGATTGGGATGTTGGGTT      |
|                          | MnSOD1 | AATTCAACGGCGGAGGTCAT      | GCACCCTCAGCACTCATCTT      |
|                          | CAT1   | ACTACAGGCACATGGAAGGC      | ATGGCTGTGATTGGCTCCTC      |
|                          | CAT2   | GCTCGATGTGACCAAGACCT      | GGCATAGGAGAAGACACGGG      |
|                          | CAT3   | ACATGGAGGGTTTCGGTGTC      | TTAGTGGCGTGGCTGTGATT      |
|                          | GR1    | TCTGGACGCCAGGAAAAGAC      | TGGATGTATCCCAACCGTGC      |
|                          | GR2    | TGGGCTGTTGGGGATGTTAC      | TCCAATAGGTGGCTGGGAGA      |
|                          | Actin  | CAGCAGAGCGGGAAATTGTAAGAG  | TTCCTTTCAGGTGGTGCAACGAC   |
